# Supplementary material
Source: Springer Nature journal article supplement (https://www.springerprofessional.de/resource/supplementary/13638_2011_347_MOESM3_ESM.pdf/11897654)
Supplement: MOESM3 [file 11897654]

IBRC: given  $r_{budget}$ , query all senders and find the final allocation that will maximize the profit from selling the resource

for  $i=1$  to  $I_{max}$ ,

$\mathfrak{R}^i = [0,0,\dots,0]$ ; //initialize  $\mathfrak{R}$

$asked\_RS = [0,0,\dots,0]$ ;  $served\_SS = [0,0,\dots,0]$ ;  $D = [1,0,0,\dots,0]$

$r_{available} = r_{budget}$ ;

do

$include\_node \leftarrow 0$ ;

  for (pick a random  $m = [0, M]$  such that  $D[m] == 1$  and  $asked\_RS[m] == 0$ ),

$(q_m^i, served\_SS\_new, D_{new}) \leftarrow query(m, p_{stream}, p_i, served\_SS, D)$ ;

$asked\_RS[m] \leftarrow 1$ ;

    if ( $q_m^i \leq r_{available}$ ) then

$include\_node \leftarrow 1$ ;  $r_m^i \leftarrow q_m^i$ ;  $r_{available} \leftarrow r_{available} - q_m^i$ ;

$served\_SS \leftarrow served\_SS\_new$ ;

$D \leftarrow D_{new}$ ;

    end if;

  exit the for loop;

  end for;

  loop until( $include\_node == 0$ );

end for;

$i_{set} \leftarrow \arg \max_i (p_i \sum_{m=1}^M r_m^i)$ ;

return  $\mathfrak{R}^{i_{set}}$ ;
